# Supplementary material for: Concurrent ETV6::ABL1 and BCR::ABL1 in a rare case of Chronic Myeloid Leukemia: A paradox of imatinib resistance and indolent clinical course
Source: Research Square preprint supplement (doi:10.21203/rs.3.rs-6495243/v1), 2025-06-16
Supplement: Supplementary file 1 [file c73d23f2acd9c83c1dff6eac.docx]

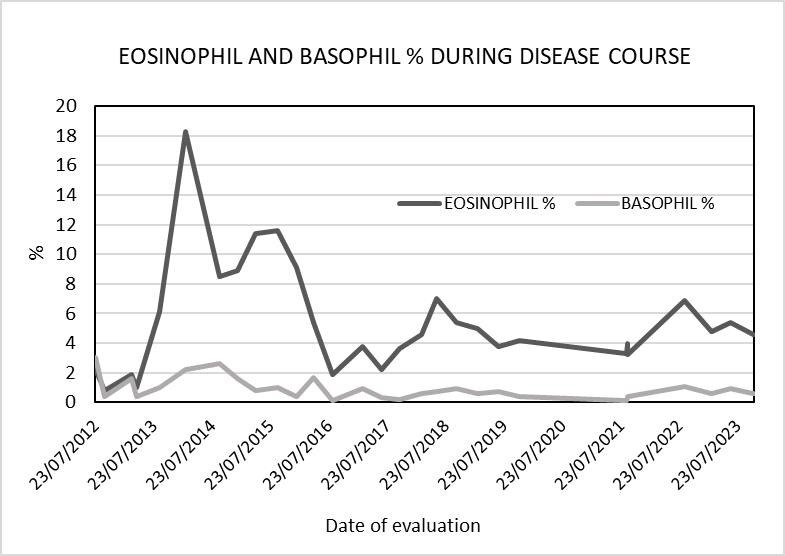


Fig.1 a) Trend analysis of Eosinophil and Basophil percentage during the course of the disease


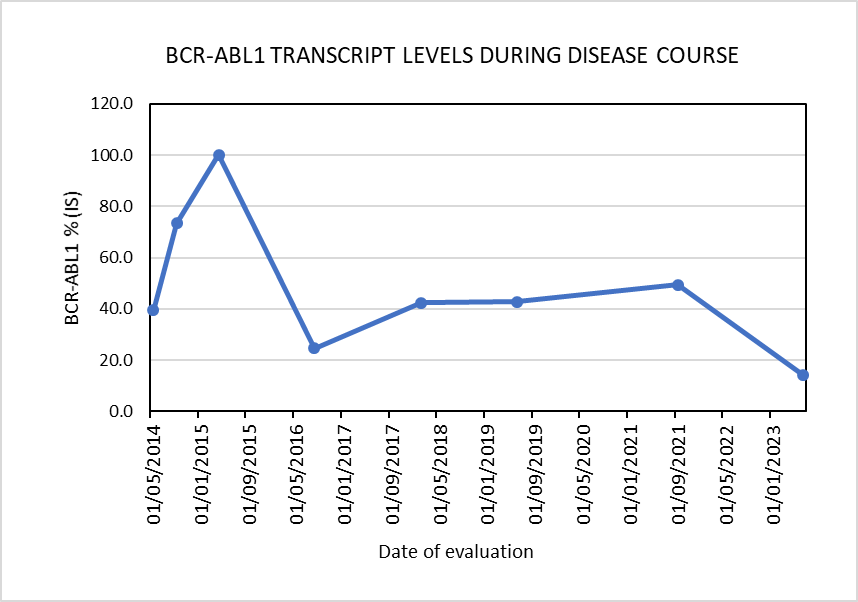


b) BCR-ABL1 transcript levels as determined on International Scale (IS) by Real Time PCR.
